# Supplementary material
Source: Springer Nature journal article supplement (https://www.springermedizin.de/resource/supplementary/12880_2009_71_MOESM2_ESM.pdf/9450480)

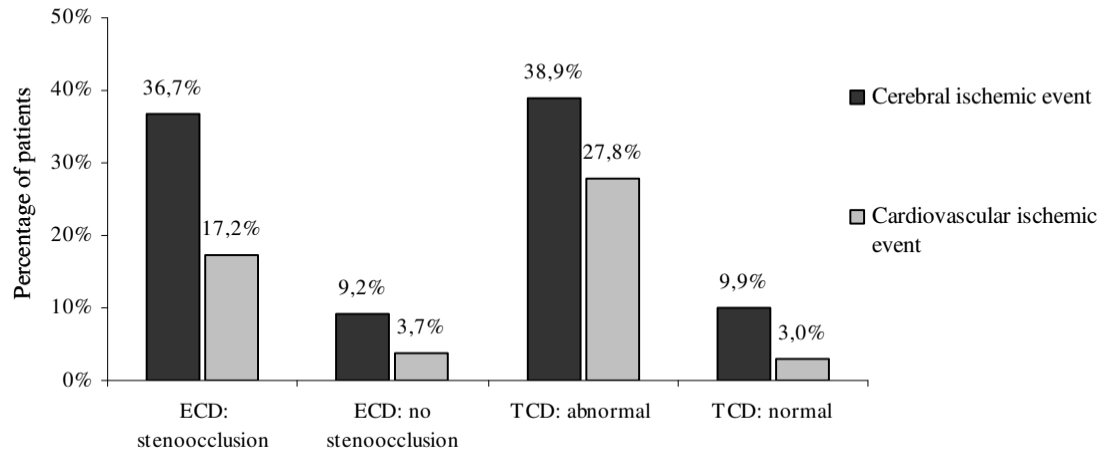

Supplement: MOESM2 [file 9450480]
